# Understanding and fighting cancer

**Divyansha Aggrwal**  
(United Kingdom)

The Biochemical Society identifies and celebrates outstanding science communication talent in molecular biosciences with its annual Science Communication Prize. Divyansha Aggrwal, from the UK, won the second prize in the media category for students studying for A-level/T-level/BTEC National/Scottish Highers or equivalent qualifications. Divyansha's entry is titled 'Understanding and Fighting Cancer'.

## Introduction from the author

Cancer, the disease responsible for approximately every sixth death, is one we have all heard of. But what are the events that lead to cancer? What sorts of biochemical interactions drive cancer formation? And lastly, what can we do to reduce our risk of getting cancer?

## Entry

Understanding and fighting cancer - YouTube. ■

*You can view all the winners from 2022 and 2023 on our website. The Science Communication Prize will be back in summer 2024! Stay updated through our website and social media.*

## Author information

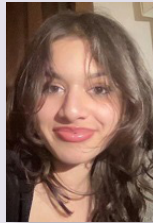

*Cancer's chemical biology, which weaponizes our cells' intricate mechanisms against us, fascinates me. The competition provided a perfect platform to couple my love for biochemistry and video-making while raising cancer awareness. I hope my video enhances public comprehension of cancer and compels them to delve deeper into researching this complex disease. You can view all the winners from <https://www.biochemistry.org/public-engagement/science-communication-prize/science-communication-prize-past-winners/> and <https://www.biochemistry.org/public-engagement/science-communication-prize/science-communication-prize-winners/> on our website. The <https://www.biochemistry.org/public-engagement/science-communication-prize/> will be back in summer 2024! Stay updated through our website and social media.*
